# Supplementary material for: Multi-Omic Analyses Reveal Habitat Adaptation of Marine Cyanobacterium Synechocystis sp. PCC 7338
Source: Front Microbiol. 2021 May 13;12:667450. doi: 10.3389/fmicb.2021.667450 (PMC8155712; doi:10.3389/fmicb.2021.667450)
Supplement: Supplementary file 2 [file Data_Sheet_1.XLSX]

## Sheet: Sheet1
Supplementary Data S1. Identified TSSs in Synechocystis sp. PCC 7338
TSS ID	Locus	Position	Strand	Associated gene	Category
TSS-001	CP054306	578	+	HTZ78_00015	P
TSS-002	CP054306	9245	+	HTZ78_00070	P
TSS-003	CP054306	14502	-	HTZ78_00095	P
TSS-004	CP054306	20293	+	HTZ78_00120	P
TSS-005	CP054306	24276	-	tRNA1-Ser	P
TSS-006	CP054306	25054	+	HTZ78_00150	P
TSS-007	CP054306	33298	-	HTZ78_00190	P
TSS-008	CP054306	36040	-	HTZ78_00205	P
TSS-009	CP054306	36064	+	tRNA2-Thr	P
TSS-010	CP054306	43599	+	HTZ78_00240	P
TSS-011	CP054306	59518	-	HTZ78_00315	P
TSS-012	CP054306	59718	+	HTZ78_00320	P
TSS-013	CP054306	60795	-	HTZ78_00325	P
TSS-014	CP054306	60898	+	HTZ78_00330	P
TSS-015	CP054306	67629	-	HTZ78_00365	P
TSS-016	CP054306	70088	-	HTZ78_00380	P
TSS-017	CP054306	78049	+	HTZ78_00415	P
TSS-018	CP054306	82691	+	-	N
TSS-019	CP054306	83293	+	HTZ78_00455	A
TSS-020	CP054306	96262	-	HTZ78_00525	P
TSS-021	CP054306	98164	-	HTZ78_00550	P
TSS-022	CP054306	99314	-	HTZ78_00560	P
TSS-023	CP054306	101707	-	HTZ78_00570	P
TSS-024	CP054306	111648	-	HTZ78_00640	P
TSS-025	CP054306	113142	+	HTZ78_00650	P
TSS-026	CP054306	119352	-	HTZ78_00670	P
TSS-027	CP054306	129043	-	HTZ78_00720	P
TSS-028	CP054306	132184	-	HTZ78_00735	P
TSS-029	CP054306	132773	-	-	N
TSS-030	CP054306	137475	+	HTZ78_00760	P
TSS-031	CP054306	138162	-	HTZ78_00765	I
TSS-032	CP054306	140764	-	HTZ78_00775	P
TSS-033	CP054306	142957	+	HTZ78_00785	A
TSS-034	CP054306	144543	-	HTZ78_00790	P
TSS-035	CP054306	145425	+	-	N
TSS-036	CP054306	161326	+	HTZ78_00855	P
TSS-037	CP054306	175692	+	HTZ78_00910	P
TSS-038	CP054306	179019	-	HTZ78_00935	P
TSS-039	CP054306	181001	+	HTZ78_00950	P
TSS-040	CP054306	187530	-	HTZ78_00985	S
TSS-041	CP054306	187598	-	HTZ78_00985	P
TSS-042	CP054306	190200	+	HTZ78_01010	P
TSS-043	CP054306	190388	-	HTZ78_01005	P
TSS-044	CP054306	193924	+	HTZ78_01035	P
TSS-045	CP054306	196875	+	HTZ78_01050	P
TSS-046	CP054306	204616	-	HTZ78_01075	P
TSS-047	CP054306	209653	+	-	N
TSS-048	CP054306	216582	-	HTZ78_01135	P
TSS-049	CP054306	216824	+	-	N
TSS-050	CP054306	222616	-	HTZ78_01160	P
TSS-051	CP054306	223539	+	HTZ78_01170	P
TSS-052	CP054306	225657	+	HTZ78_01180	P
TSS-053	CP054306	225701	+	HTZ78_01180	S
TSS-054	CP054306	239289	-	HTZ78_01230	P
TSS-055	CP054306	240909	+	HTZ78_01250	P
TSS-056	CP054306	242832	+	HTZ78_01260	P
TSS-057	CP054306	243460	+	HTZ78_01265	P
TSS-058	CP054306	247557	+	HTZ78_01290	P
TSS-059	CP054306	261061	-	HTZ78_01335	P
TSS-060	CP054306	262983	-	HTZ78_01340	P
TSS-061	CP054306	263060	+	HTZ78_01345	P
TSS-062	CP054306	266053	-	HTZ78_01355	P
TSS-063	CP054306	275732	-	HTZ78_01395	P
TSS-064	CP054306	276153	+	HTZ78_01400	P
TSS-065	CP054306	279594	-	HTZ78_01415	P
TSS-066	CP054306	293605	-	HTZ78_01470	P
TSS-067	CP054306	296654	-	HTZ78_01490	P
TSS-068	CP054306	298695	+	HTZ78_01505	P
TSS-069	CP054306	303740	+	HTZ78_01520	A
TSS-070	CP054306	309113	-	HTZ78_01540	P
TSS-071	CP054306	315951	-	HTZ78_01585	P
TSS-072	CP054306	316043	+	HTZ78_01590	P
TSS-073	CP054306	317799	+	HTZ78_01605	P
TSS-074	CP054306	322986	+	HTZ78_01625	P
TSS-075	CP054306	324046	+	HTZ78_01630	P
TSS-076	CP054306	327997	-	HTZ78_01640	P
TSS-077	CP054306	330447	-	HTZ78_01655	P
TSS-078	CP054306	330620	+	HTZ78_01660	P
TSS-079	CP054306	334164	-	HTZ78_01675	P
TSS-080	CP054306	334529	-	HTZ78_01680	P
TSS-081	CP054306	334755	-	HTZ78_01680	S
TSS-082	CP054306	335098	+	HTZ78_01685	P
TSS-083	CP054306	338410	+	HTZ78_01705	P
TSS-084	CP054306	346724	+	HTZ78_01735	P
TSS-085	CP054306	350130	-	HTZ78_01745	S
TSS-086	CP054306	350168	-	HTZ78_01745	P
TSS-087	CP054306	353676	-	HTZ78_01765	P
TSS-088	CP054306	362650	+	HTZ78_01810	P
TSS-089	CP054306	368815	-	HTZ78_01825	S
TSS-090	CP054306	368861	-	HTZ78_01825	P
TSS-091	CP054306	369285	-	HTZ78_01830	I
TSS-092	CP054306	373057	-	HTZ78_01835	P
TSS-093	CP054306	373203	+	HTZ78_01840	P
TSS-094	CP054306	375282	+	HTZ78_01850	P
TSS-095	CP054306	379799	+	HTZ78_01875	P
TSS-096	CP054306	380960	+	HTZ78_01880	P
TSS-097	CP054306	381018	+	HTZ78_01880	S
TSS-098	CP054306	394644	+	HTZ78_01945	P
TSS-099	CP054306	395857	-	HTZ78_01950	P
TSS-100	CP054306	401354	-	HTZ78_01965	P
TSS-101	CP054306	401477	+	HTZ78_01970	P
TSS-102	CP054306	406824	+	HTZ78_01985	P
TSS-103	CP054306	416353	-	HTZ78_02015	P
TSS-104	CP054306	419765	-	HTZ78_02035	P
TSS-105	CP054306	419954	+	HTZ78_02040	P
TSS-106	CP054306	422335	+	HTZ78_02050	P
TSS-107	CP054306	426229	-	HTZ78_02055	P
TSS-108	CP054306	427784	-	HTZ78_02065	P
TSS-109	CP054306	427943	+	HTZ78_02070	P
TSS-110	CP054306	429680	+	HTZ78_02085	P
TSS-111	CP054306	431893	+	-	N
TSS-112	CP054306	435526	-	HTZ78_02105	P
TSS-113	CP054306	435757	+	HTZ78_02110	P
TSS-114	CP054306	445947	+	HTZ78_02145	P
TSS-115	CP054306	454440	+	HTZ78_02175	P
TSS-116	CP054306	467294	-	HTZ78_02225	P
TSS-117	CP054306	471537	-	HTZ78_02250	P
TSS-118	CP054306	473360	+	HTZ78_02260	P
TSS-119	CP054306	475211	-	HTZ78_02265	P
TSS-120	CP054306	479881	+	HTZ78_02285	P
TSS-121	CP054306	482487	-	HTZ78_02300	P
TSS-122	CP054306	483342	+	HTZ78_02310	P
TSS-123	CP054306	483453	+	HTZ78_02310	S
TSS-124	CP054306	485732	-	HTZ78_02315	P
TSS-125	CP054306	493855	-	HTZ78_02355	P
TSS-126	CP054306	509814	-	HTZ78_02435	P
TSS-127	CP054306	509872	+	HTZ78_02440	P
TSS-128	CP054306	509900	-	HTZ78_02435	S
TSS-129	CP054306	514224	-	HTZ78_02460	P
TSS-130	CP054306	517709	-	HTZ78_02485	P
TSS-131	CP054306	520060	+	HTZ78_02495	P
TSS-132	CP054306	530065	+	HTZ78_02540	P
TSS-133	CP054306	537278	+	HTZ78_02580	P
TSS-134	CP054306	544184	+	HTZ78_02610	P
TSS-135	CP054306	547551	-	HTZ78_02615	S
TSS-136	CP054306	547622	-	HTZ78_02615	P
TSS-137	CP054306	551117	-	HTZ78_02640	P
TSS-138	CP054306	554202	+	HTZ78_02655	P
TSS-139	CP054306	554373	-	HTZ78_02650	S
TSS-140	CP054306	554399	-	HTZ78_02650	P
TSS-141	CP054306	555552	+	HTZ78_02660	P
TSS-142	CP054306	567012	+	HTZ78_02705	P
TSS-143	CP054306	574509	-	HTZ78_02745	P
TSS-144	CP054306	575437	-	HTZ78_02750	P
TSS-145	CP054306	575826	+	HTZ78_02760	P
TSS-146	CP054306	579934	+	HTZ78_02775	P
TSS-147	CP054306	582689	-	HTZ78_02785	P
TSS-148	CP054306	585333	+	HTZ78_02810	P
TSS-149	CP054306	592538	+	HTZ78_02850	P
TSS-150	CP054306	598551	-	HTZ78_02875	P
TSS-151	CP054306	601699	-	HTZ78_02890	P
TSS-152	CP054306	603424	+	HTZ78_02900	P
TSS-153	CP054306	605013	+	HTZ78_02905	P
TSS-154	CP054306	606402	+	HTZ78_02910	P
TSS-155	CP054306	607928	+	HTZ78_02920	P
TSS-156	CP054306	612379	-	HTZ78_02930	P
TSS-157	CP054306	619474	-	HTZ78_02965	P
TSS-158	CP054306	623840	-	HTZ78_02980	P
TSS-159	CP054306	624687	+	-	N
TSS-160	CP054306	630120	+	HTZ78_03010	P
TSS-161	CP054306	631026	+	HTZ78_03020	P
TSS-162	CP054306	636866	-	HTZ78_03030	P
TSS-163	CP054306	639514	+	HTZ78_03045	P
TSS-164	CP054306	645219	-	HTZ78_03070	P
TSS-165	CP054306	647096	-	HTZ78_03080	A
TSS-166	CP054306	650213	+	HTZ78_03100	P
TSS-167	CP054306	657420	-	HTZ78_03130	P
TSS-168	CP054306	665192	-	HTZ78_03160	P
TSS-169	CP054306	667844	-	HTZ78_03170	P
TSS-170	CP054306	673218	-	HTZ78_03190	P
TSS-171	CP054306	676932	-	HTZ78_03205	P
TSS-172	CP054306	680064	+	HTZ78_03230	P
TSS-173	CP054306	682615	-	HTZ78_03235	P
TSS-174	CP054306	688491	-	HTZ78_03260	P
TSS-175	CP054306	690961	-	HTZ78_03275	P
TSS-176	CP054306	695661	+	HTZ78_03290	P
TSS-177	CP054306	697667	-	HTZ78_03300	P
TSS-178	CP054306	697824	+	HTZ78_03305	P
TSS-179	CP054306	700666	-	HTZ78_03315	P
TSS-180	CP054306	707328	+	HTZ78_03345	P
TSS-181	CP054306	710995	+	HTZ78_03380	P
TSS-182	CP054306	715170	-	HTZ78_03395	P
TSS-183	CP054306	719639	-	HTZ78_03410	P
TSS-184	CP054306	721589	-	HTZ78_03420	P
TSS-185	CP054306	721655	+	HTZ78_03425	P
TSS-186	CP054306	726134	+	HTZ78_03435	P
TSS-187	CP054306	731342	-	HTZ78_03455	P
TSS-188	CP054306	742738	+	HTZ78_03515	P
TSS-189	CP054306	747073	-	HTZ78_03535	P
TSS-190	CP054306	749989	+	HTZ78_03555	P
TSS-191	CP054306	752160	+	HTZ78_03565	P
TSS-192	CP054306	760394	-	HTZ78_03610	P
TSS-193	CP054306	766877	-	HTZ78_03645	P
TSS-194	CP054306	771026	-	HTZ78_03660	P
TSS-195	CP054306	771092	+	HTZ78_03665	P
TSS-196	CP054306	777138	+	HTZ78_03695	P
TSS-197	CP054306	779255	+	HTZ78_03705	P
TSS-198	CP054306	788625	-	HTZ78_03735	P
TSS-199	CP054306	791429	-	HTZ78_03750	P
TSS-200	CP054306	791507	+	HTZ78_03755	P
TSS-201	CP054306	798670	+	HTZ78_03795	S
TSS-202	CP054306	798719	-	HTZ78_03790	P
TSS-203	CP054306	798835	+	HTZ78_03795	P
TSS-204	CP054306	799343	+	HTZ78_03800	P
TSS-205	CP054306	804096	-	HTZ78_03810	P
TSS-206	CP054306	816318	-	HTZ78_03860	P
TSS-207	CP054306	816463	+	HTZ78_03870	P
TSS-208	CP054306	818061	+	HTZ78_03875	P
TSS-209	CP054306	820495	-	-	N
TSS-210	CP054306	823689	+	HTZ78_03900	P
TSS-211	CP054306	824730	-	HTZ78_03905	P
TSS-212	CP054306	824731	+	HTZ78_03910	P
TSS-213	CP054306	826192	+	HTZ78_03915	P
TSS-214	CP054306	826870	+	HTZ78_03920	P
TSS-215	CP054306	829766	-	HTZ78_03935	P
TSS-216	CP054306	836033	-	HTZ78_03965	A
TSS-217	CP054306	836468	+	HTZ78_03970	P
TSS-218	CP054306	839376	+	HTZ78_03990	P
TSS-219	CP054306	844768	+	HTZ78_04010	P
TSS-220	CP054306	849812	-	HTZ78_04035	P
TSS-221	CP054306	852676	-	HTZ78_04045	P
TSS-222	CP054306	856030	+	HTZ78_04060	P
TSS-223	CP054306	858763	-	HTZ78_04065	P
TSS-224	CP054306	862623	-	HTZ78_04095	P
TSS-225	CP054306	866832	+	HTZ78_04120	P
TSS-226	CP054306	868500	+	-	N
TSS-227	CP054306	872437	+	HTZ78_04145	P
TSS-228	CP054306	880650	+	HTZ78_04215	P
TSS-229	CP054306	896232	+	HTZ78_04320	P
TSS-230	CP054306	896973	+	HTZ78_04325	P
TSS-231	CP054306	900765	+	HTZ78_04345	P
TSS-232	CP054306	916285	-	HTZ78_04430	A
TSS-233	CP054306	918877	+	HTZ78_04445	P
TSS-234	CP054306	921698	-	HTZ78_04455	P
TSS-235	CP054306	927048	-	HTZ78_04480	P
TSS-236	CP054306	933765	-	HTZ78_04515	P
TSS-237	CP054306	933944	+	HTZ78_04520	P
TSS-238	CP054306	940673	+	HTZ78_04535	P
TSS-239	CP054306	944649	+	HTZ78_04555	P
TSS-240	CP054306	946561	+	HTZ78_04565	P
TSS-241	CP054306	947727	-	HTZ78_04565	A
TSS-242	CP054306	957226	+	HTZ78_04615	P
TSS-243	CP054306	970295	-	HTZ78_04685	P
TSS-244	CP054306	970457	+	HTZ78_04690	P
TSS-245	CP054306	971658	-	HTZ78_04695	P
TSS-246	CP054306	975444	-	HTZ78_04715	P
TSS-247	CP054306	977396	+	HTZ78_04725	A
TSS-248	CP054306	978223	+	HTZ78_04735	P
TSS-249	CP054306	981387	+	HTZ78_04755	P
TSS-250	CP054306	983851	-	HTZ78_04760	P
TSS-251	CP054306	984084	+	HTZ78_04765	P
TSS-252	CP054306	991047	-	HTZ78_04815	S
TSS-253	CP054306	991156	-	HTZ78_04815	P
TSS-254	CP054306	1003980	+	HTZ78_04855	P
TSS-255	CP054306	1007849	-	HTZ78_04870	A
TSS-256	CP054306	1009703	-	HTZ78_04880	P
TSS-257	CP054306	1010149	-	HTZ78_04885	P
TSS-258	CP054306	1011597	+	HTZ78_04895	A
TSS-259	CP054306	1016580	-	HTZ78_04925	P
TSS-260	CP054306	1021912	+	HTZ78_04950	P
TSS-261	CP054306	1027584	+	HTZ78_04975	P
TSS-262	CP054306	1042328	+	HTZ78_05050	P
TSS-263	CP054306	1043206	-	HTZ78_05055	P
TSS-264	CP054306	1046986	+	HTZ78_05080	P
TSS-265	CP054306	1052119	+	HTZ78_05100	P
TSS-266	CP054306	1057600	-	HTZ78_05125	P
TSS-267	CP054306	1067546	-	HTZ78_05185	P
TSS-268	CP054306	1072901	-	HTZ78_05210	P
TSS-269	CP054306	1073051	+	HTZ78_05215	P
TSS-270	CP054306	1074336	+	HTZ78_05225	P
TSS-271	CP054306	1075979	-	HTZ78_05235	P
TSS-272	CP054306	1076059	-	HTZ78_05235	S
TSS-273	CP054306	1076074	+	HTZ78_05240	P
TSS-274	CP054306	1080094	-	HTZ78_05250	P
TSS-275	CP054306	1081788	+	HTZ78_05265	P
TSS-276	CP054306	1088803	+	HTZ78_05290	P
TSS-277	CP054306	1092022	+	HTZ78_05300	P
TSS-278	CP054306	1096715	-	HTZ78_05330	P
TSS-279	CP054306	1100412	+	HTZ78_05360	P
TSS-280	CP054306	1102040	+	HTZ78_05370	P
TSS-281	CP054306	1121483	+	HTZ78_05450	P
TSS-282	CP054306	1124485	-	HTZ78_05455	S
TSS-283	CP054306	1124561	-	HTZ78_05455	P
TSS-284	CP054306	1126133	+	HTZ78_05470	P
TSS-285	CP054306	1129194	+	HTZ78_05500	P
TSS-286	CP054306	1133823	+	HTZ78_05515	P
TSS-287	CP054306	1137082	-	HTZ78_05525	P
TSS-288	CP054306	1139838	-	HTZ78_05535	P
TSS-289	CP054306	1144510	+	HTZ78_05555	P
TSS-290	CP054306	1151370	+	HTZ78_05575	P
TSS-291	CP054306	1161897	-	HTZ78_05610	P
TSS-292	CP054306	1164333	+	HTZ78_05630	A
TSS-293	CP054306	1170194	-	HTZ78_05650	P
TSS-294	CP054306	1181985	-	HTZ78_05705	P
TSS-295	CP054306	1182131	+	HTZ78_05710	P
TSS-296	CP054306	1187767	-	HTZ78_05735	P
TSS-297	CP054306	1188155	+	HTZ78_05745	P
TSS-298	CP054306	1190408	+	HTZ78_05760	P
TSS-299	CP054306	1193762	-	HTZ78_05775	P
TSS-300	CP054306	1204332	-	HTZ78_05825	P
TSS-301	CP054306	1205123	+	HTZ78_05835	P
TSS-302	CP054306	1212288	-	HTZ78_05860	P
TSS-303	CP054306	1213187	-	HTZ78_05865	P
TSS-304	CP054306	1213289	+	HTZ78_05870	P
TSS-305	CP054306	1219160	-	HTZ78_05890	P
TSS-306	CP054306	1219985	+	HTZ78_05900	P
TSS-307	CP054306	1227449	+	HTZ78_05930	P
TSS-308	CP054306	1227858	+	HTZ78_05935	P
TSS-309	CP054306	1232858	-	HTZ78_05955	P
TSS-310	CP054306	1249190	+	HTZ78_06050	P
TSS-311	CP054306	1257700	-	HTZ78_06085	P
TSS-312	CP054306	1276306	-	HTZ78_06170	P
TSS-313	CP054306	1276812	+	HTZ78_06175	P
TSS-314	CP054306	1281316	+	HTZ78_06195	P
TSS-315	CP054306	1294273	+	HTZ78_06250	A
TSS-316	CP054306	1295599	+	HTZ78_06255	P
TSS-317	CP054306	1318074	+	HTZ78_06335	I
TSS-318	CP054306	1322216	-	HTZ78_06345	P
TSS-319	CP054306	1330186	-	HTZ78_06380	P
TSS-320	CP054306	1330928	+	-	N
TSS-321	CP054306	1331700	+	HTZ78_06390	A
TSS-322	CP054306	1332146	+	-	N
TSS-323	CP054306	1338373	-	HTZ78_06425	P
TSS-324	CP054306	1343685	+	HTZ78_06455	P
TSS-325	CP054306	1346667	+	HTZ78_06475	P
TSS-326	CP054306	1369759	+	HTZ78_06525	P
TSS-327	CP054306	1384853	+	HTZ78_06620	P
TSS-328	CP054306	1385899	-	HTZ78_06625	P
TSS-329	CP054306	1386035	+	HTZ78_06630	P
TSS-330	CP054306	1396789	-	HTZ78_06650	P
TSS-331	CP054306	1396892	+	HTZ78_06655	P
TSS-332	CP054306	1398939	-	HTZ78_06665	A
TSS-333	CP054306	1399887	+	HTZ78_06670	P
TSS-334	CP054306	1401589	-	HTZ78_06680	P
TSS-335	CP054306	1401690	+	HTZ78_06685	P
TSS-336	CP054306	1402571	+	HTZ78_06690	P
TSS-337	CP054306	1407692	+	HTZ78_06720	S
TSS-338	CP054306	1407958	+	HTZ78_06720	P
TSS-339	CP054306	1415110	-	HTZ78_06735	P
TSS-340	CP054306	1415637	+	HTZ78_06745	P
TSS-341	CP054306	1423477	+	HTZ78_06780	P
TSS-342	CP054306	1427983	-	HTZ78_06795	P
TSS-343	CP054306	1428385	-	HTZ78_06795	S
TSS-344	CP054306	1429366	+	HTZ78_06805	P
TSS-345	CP054306	1430832	+	HTZ78_06810	P
TSS-346	CP054306	1435363	+	HTZ78_06825	P
TSS-347	CP054306	1436549	+	HTZ78_06830	P
TSS-348	CP054306	1447355	-	HTZ78_06885	P
TSS-349	CP054306	1447383	-	HTZ78_06885	S
TSS-350	CP054306	1471444	+	HTZ78_06980	P
TSS-351	CP054306	1480973	-	HTZ78_07030	P
TSS-352	CP054306	1484268	-	HTZ78_07040	P
TSS-353	CP054306	1486509	+	HTZ78_07050	P
TSS-354	CP054306	1489968	+	HTZ78_07070	P
TSS-355	CP054306	1490904	+	HTZ78_07080	P
TSS-356	CP054306	1495503	-	HTZ78_07105	P
TSS-357	CP054306	1495613	+	HTZ78_07110	P
TSS-358	CP054306	1504417	-	HTZ78_07160	P
TSS-359	CP054306	1512794	-	HTZ78_07200	P
TSS-360	CP054306	1518048	-	HTZ78_07225	P
TSS-361	CP054306	1524045	+	HTZ78_07250	P
TSS-362	CP054306	1527378	-	HTZ78_07265	P
TSS-363	CP054306	1548820	+	HTZ78_07345	P
TSS-364	CP054306	1549164	+	HTZ78_07350	P
TSS-365	CP054306	1561323	-	HTZ78_07390	P
TSS-366	CP054306	1561341	+	HTZ78_07395	P
TSS-367	CP054306	1562920	+	HTZ78_07410	P
TSS-368	CP054306	1564439	-	HTZ78_07420	P
TSS-369	CP054306	1565983	+	HTZ78_07435	P
TSS-370	CP054306	1568901	-	HTZ78_07450	P
TSS-371	CP054306	1571060	+	HTZ78_07465	P
TSS-372	CP054306	1574736	+	HTZ78_07480	P
TSS-373	CP054306	1585476	-	HTZ78_07520	P
TSS-374	CP054306	1585598	-	tRNA18-Arg	P
TSS-375	CP054306	1589625	+	HTZ78_07545	P
TSS-376	CP054306	1591358	+	HTZ78_07550	I
TSS-377	CP054306	1600752	+	HTZ78_07585	P
TSS-378	CP054306	1606069	+	HTZ78_07605	S
TSS-379	CP054306	1606191	+	HTZ78_07605	P
TSS-380	CP054306	1610393	+	-	N
TSS-381	CP054306	1610950	-	HTZ78_07625	I
TSS-382	CP054306	1618367	+	-	N
TSS-383	CP054306	1622926	-	HTZ78_07670	P
TSS-384	CP054306	1630263	-	HTZ78_07700	I
TSS-385	CP054306	1632109	-	HTZ78_07705	P
TSS-386	CP054306	1632308	+	HTZ78_07710	P
TSS-387	CP054306	1636397	-	HTZ78_07720	P
TSS-388	CP054306	1638015	-	HTZ78_07725	P
TSS-389	CP054306	1638507	+	HTZ78_07735	P
TSS-390	CP054306	1640563	-	HTZ78_07745	P
TSS-391	CP054306	1643548	+	HTZ78_07765	P
TSS-392	CP054306	1647129	+	HTZ78_07780	P
TSS-393	CP054306	1648958	-	HTZ78_07785	P
TSS-394	CP054306	1657109	-	HTZ78_07820	P
TSS-395	CP054306	1661590	+	HTZ78_07840	P
TSS-396	CP054306	1664157	-	HTZ78_07845	P
TSS-397	CP054306	1670996	+	HTZ78_07880	P
TSS-398	CP054306	1678291	-	HTZ78_07905	P
TSS-399	CP054306	1680543	-	HTZ78_07910	P
TSS-400	CP054306	1687262	-	HTZ78_07940	P
TSS-401	CP054306	1692607	-	-	N
TSS-402	CP054306	1694656	-	HTZ78_07965	P
TSS-403	CP054306	1694951	+	HTZ78_07975	P
TSS-404	CP054306	1698763	-	HTZ78_07995	P
TSS-405	CP054306	1698835	+	HTZ78_08000	P
TSS-406	CP054306	1700434	+	-	N
TSS-407	CP054306	1704064	-	HTZ78_08025	P
TSS-408	CP054306	1706323	-	HTZ78_08035	P
TSS-409	CP054306	1707738	+	HTZ78_08055	P
TSS-410	CP054306	1712993	-	HTZ78_08080	P
TSS-411	CP054306	1716289	-	HTZ78_08105	P
TSS-412	CP054306	1727890	-	HTZ78_08160	P
TSS-413	CP054306	1732682	+	HTZ78_08180	P
TSS-414	CP054306	1732792	+	HTZ78_08180	S
TSS-415	CP054306	1743714	-	HTZ78_08230	I
TSS-416	CP054306	1759790	-	HTZ78_08305	P
TSS-417	CP054306	1762142	+	HTZ78_08325	P
TSS-418	CP054306	1769437	-	HTZ78_08360	P
TSS-419	CP054306	1769442	+	HTZ78_08365	P
TSS-420	CP054306	1772980	+	HTZ78_08375	P
TSS-421	CP054306	1780151	+	HTZ78_08410	P
TSS-422	CP054306	1780182	-	HTZ78_08405	P
TSS-423	CP054306	1786363	+	HTZ78_08445	A
TSS-424	CP054306	1786619	-	HTZ78_08445	P
TSS-425	CP054306	1787702	-	HTZ78_08450	P
TSS-426	CP054306	1788669	+	HTZ78_08460	P
TSS-427	CP054306	1788864	-	HTZ78_08455	P
TSS-428	CP054306	1791420	+	HTZ78_08475	P
TSS-429	CP054306	1798186	+	HTZ78_08505	P
TSS-430	CP054306	1800082	-	HTZ78_08510	P
TSS-431	CP054306	1802662	-	HTZ78_08520	P
TSS-432	CP054306	1809576	-	HTZ78_08540	P
TSS-433	CP054306	1810722	+	HTZ78_08550	P
TSS-434	CP054306	1817592	-	HTZ78_08575	P
TSS-435	CP054306	1826927	-	HTZ78_08600	P
TSS-436	CP054306	1833272	-	HTZ78_08635	P
TSS-437	CP054306	1836286	+	HTZ78_08655	P
TSS-438	CP054306	1839460	+	tRNA23-Leu	P
TSS-439	CP054306	1840761	+	HTZ78_08680	P
TSS-440	CP054306	1844342	+	HTZ78_08690	P
TSS-441	CP054306	1846620	+	HTZ78_08695	S
TSS-442	CP054306	1846699	+	HTZ78_08695	P
TSS-443	CP054306	1848620	+	HTZ78_08710	P
TSS-444	CP054306	1852428	+	HTZ78_08730	P
TSS-445	CP054306	1857764	-	HTZ78_08750	P
TSS-446	CP054306	1857955	+	HTZ78_08755	P
TSS-447	CP054306	1862303	-	HTZ78_08760	A
TSS-448	CP054306	1867107	+	HTZ78_08785	P
TSS-449	CP054306	1871510	+	HTZ78_08810	P
TSS-450	CP054306	1877863	-	HTZ78_08855	P
TSS-451	CP054306	1878149	+	HTZ78_08865	P
TSS-452	CP054306	1886004	-	HTZ78_08885	A
TSS-453	CP054306	1888543	+	HTZ78_08900	P
TSS-454	CP054306	1896115	-	HTZ78_08920	P
TSS-455	CP054306	1897393	-	HTZ78_08935	P
TSS-456	CP054306	1911946	-	HTZ78_09005	P
TSS-457	CP054306	1937924	+	HTZ78_09115	P
TSS-458	CP054306	1938103	-	HTZ78_09110	P
TSS-459	CP054306	1942142	+	HTZ78_09135	P
TSS-460	CP054306	1942987	+	HTZ78_09145	P
TSS-461	CP054306	1945455	+	HTZ78_09150	A
TSS-462	CP054306	1954852	+	HTZ78_09185	P
TSS-463	CP054306	1958582	+	-	N
TSS-464	CP054306	1965332	-	HTZ78_09220	P
TSS-465	CP054306	1965614	+	HTZ78_09225	P
TSS-466	CP054306	1970840	+	HTZ78_09250	P
TSS-467	CP054306	1976054	-	HTZ78_09260	P
TSS-468	CP054306	1992478	+	HTZ78_09340	P
TSS-469	CP054306	1994403	+	HTZ78_09350	P
TSS-470	CP054306	1996004	+	HTZ78_09360	P
TSS-471	CP054306	2002299	-	HTZ78_09385	P
TSS-472	CP054306	2002368	+	HTZ78_09390	P
TSS-473	CP054306	2003581	-	HTZ78_09395	P
TSS-474	CP054306	2004678	-	HTZ78_09405	P
TSS-475	CP054306	2006198	+	HTZ78_09415	P
TSS-476	CP054306	2007230	+	HTZ78_09420	P
TSS-477	CP054306	2017269	-	HTZ78_09460	P
TSS-478	CP054306	2022916	-	HTZ78_09480	P
TSS-479	CP054306	2027196	-	HTZ78_09490	P
TSS-480	CP054306	2028773	-	HTZ78_09495	I
TSS-481	CP054306	2030144	-	HTZ78_09495	P
TSS-482	CP054306	2030479	+	HTZ78_09500	P
TSS-483	CP054306	2037240	+	HTZ78_09540	P
TSS-484	CP054306	2040368	-	HTZ78_09550	P
TSS-485	CP054306	2058003	+	HTZ78_09625	P
TSS-486	CP054306	2060941	-	HTZ78_09640	P
TSS-487	CP054306	2071183	-	HTZ78_09675	P
TSS-488	CP054306	2074586	-	HTZ78_09695	P
TSS-489	CP054306	2087033	-	HTZ78_09770	P
TSS-490	CP054306	2094298	+	HTZ78_09820	P
TSS-491	CP054306	2102995	-	HTZ78_09840	P
TSS-492	CP054306	2110869	-	HTZ78_09865	P
TSS-493	CP054306	2111249	-	HTZ78_09870	P
TSS-494	CP054306	2122960	-	HTZ78_09905	P
TSS-495	CP054306	2125752	-	HTZ78_09920	P
TSS-496	CP054306	2127477	+	HTZ78_09930	P
TSS-497	CP054306	2130233	-	HTZ78_09940	P
TSS-498	CP054306	2136053	-	HTZ78_09965	A
TSS-499	CP054306	2139662	-	HTZ78_09980	P
TSS-500	CP054306	2141532	+	HTZ78_10000	P
TSS-501	CP054306	2148492	+	HTZ78_10035	P
TSS-502	CP054306	2150927	+	HTZ78_10055	P
TSS-503	CP054306	2155209	+	HTZ78_10075	P
TSS-504	CP054306	2158997	-	HTZ78_10090	A
TSS-505	CP054306	2172187	+	HTZ78_10150	P
TSS-506	CP054306	2174906	+	HTZ78_10165	P
TSS-507	CP054306	2180243	-	HTZ78_10185	P
TSS-508	CP054306	2182588	-	HTZ78_10195	P
TSS-509	CP054306	2187906	+	HTZ78_10225	P
TSS-510	CP054306	2191225	-	HTZ78_10235	P
TSS-511	CP054306	2193988	+	HTZ78_10255	P
TSS-512	CP054306	2196693	-	HTZ78_10275	P
TSS-513	CP054306	2199115	+	HTZ78_10290	P
TSS-514	CP054306	2201178	+	HTZ78_10300	P
TSS-515	CP054306	2206863	-	HTZ78_10330	P
TSS-516	CP054306	2209705	+	HTZ78_10350	P
TSS-517	CP054306	2213363	-	HTZ78_10365	P
TSS-518	CP054306	2213588	+	HTZ78_10370	P
TSS-519	CP054306	2223787	-	HTZ78_10410	P
TSS-520	CP054306	2226570	-	HTZ78_10415	I
TSS-521	CP054306	2226975	+	HTZ78_10420	P
TSS-522	CP054306	2231700	-	HTZ78_10445	P
TSS-523	CP054306	2232650	-	-	N
TSS-524	CP054306	2232755	-	-	N
TSS-525	CP054306	2236686	+	HTZ78_10475	P
TSS-526	CP054306	2237167	+	HTZ78_10475	I
TSS-527	CP054306	2241231	+	HTZ78_10490	P
TSS-528	CP054306	2241785	-	HTZ78_10490	A
TSS-529	CP054306	2242360	+	HTZ78_10495	P
TSS-530	CP054306	2246360	-	HTZ78_10510	P
TSS-531	CP054306	2247884	+	HTZ78_10520	P
TSS-532	CP054306	2252064	-	HTZ78_10545	P
TSS-533	CP054306	2253179	+	HTZ78_10560	P
TSS-534	CP054306	2257929	-	HTZ78_10580	P
TSS-535	CP054306	2264351	+	HTZ78_10610	S
TSS-536	CP054306	2264393	+	HTZ78_10610	P
TSS-537	CP054306	2270475	+	HTZ78_10635	P
TSS-538	CP054306	2275880	-	HTZ78_10650	P
TSS-539	CP054306	2277153	-	HTZ78_10655	P
TSS-540	CP054306	2277198	-	HTZ78_10655	S
TSS-541	CP054306	2277919	+	HTZ78_10665	P
TSS-542	CP054306	2280492	+	HTZ78_10680	P
TSS-543	CP054306	2286174	-	HTZ78_10710	P
TSS-544	CP054306	2287988	-	tRNA28-Glu	P
TSS-545	CP054306	2288582	+	HTZ78_10735	P
TSS-546	CP054306	2292435	+	HTZ78_10760	P
TSS-547	CP054306	2292457	-	HTZ78_10755	P
TSS-548	CP054306	2293649	+	HTZ78_10770	P
TSS-549	CP054306	2301552	-	HTZ78_10800	P
TSS-550	CP054306	2303772	-	HTZ78_10810	P
TSS-551	CP054306	2303834	+	HTZ78_10815	P
TSS-552	CP054306	2326280	+	HTZ78_10895	P
TSS-553	CP054306	2327062	+	HTZ78_10900	P
TSS-554	CP054306	2350083	+	HTZ78_10910	P
TSS-555	CP054306	2352933	+	HTZ78_10925	P
TSS-556	CP054306	2353945	+	HTZ78_10930	P
TSS-557	CP054306	2358834	-	HTZ78_10950	P
TSS-558	CP054306	2359019	+	HTZ78_10955	P
TSS-559	CP054306	2360296	-	-	N
TSS-560	CP054306	2362234	+	HTZ78_10985	P
TSS-561	CP054306	2370614	-	HTZ78_11025	P
TSS-562	CP054306	2374123	-	HTZ78_11040	P
TSS-563	CP054306	2376973	-	HTZ78_11055	P
TSS-564	CP054306	2377413	-	HTZ78_11060	P
TSS-565	CP054306	2383595	-	HTZ78_11095	P
TSS-566	CP054306	2386601	-	HTZ78_11100	P
TSS-567	CP054306	2388251	+	HTZ78_11115	P
TSS-568	CP054306	2395957	-	HTZ78_11135	I
TSS-569	CP054306	2397887	+	HTZ78_11150	P
TSS-570	CP054306	2404599	+	HTZ78_11195	P
TSS-571	CP054306	2410951	+	HTZ78_11225	P
TSS-572	CP054306	2435897	+	HTZ78_11350	A
TSS-573	CP054306	2438914	-	HTZ78_11370	P
TSS-574	CP054306	2442358	+	HTZ78_11385	P
TSS-575	CP054306	2447082	-	HTZ78_11395	P
TSS-576	CP054306	2451456	-	HTZ78_11410	P
TSS-577	CP054306	2452644	-	HTZ78_11415	P
TSS-578	CP054306	2454278	-	HTZ78_11425	P
TSS-579	CP054306	2454424	+	HTZ78_11430	P
TSS-580	CP054306	2461308	+	HTZ78_11470	P
TSS-581	CP054306	2462980	+	HTZ78_11475	P
TSS-582	CP054306	2468466	-	HTZ78_11495	P
TSS-583	CP054306	2469459	-	HTZ78_11500	P
TSS-584	CP054306	2472472	-	HTZ78_11510	P
TSS-585	CP054306	2472553	+	HTZ78_11515	P
TSS-586	CP054306	2478030	-	HTZ78_11530	P
TSS-587	CP054306	2479514	+	HTZ78_11545	P
TSS-588	CP054306	2482584	-	HTZ78_11555	P
TSS-589	CP054306	2483533	+	HTZ78_11565	P
TSS-590	CP054306	2485046	+	HTZ78_11570	P
TSS-591	CP054306	2487534	+	HTZ78_11585	P
TSS-592	CP054306	2503646	-	HTZ78_11645	P
TSS-593	CP054306	2504628	+	HTZ78_11655	P
TSS-594	CP054306	2510159	-	HTZ78_11675	P
TSS-595	CP054306	2513824	+	HTZ78_11695	P
TSS-596	CP054306	2517101	-	HTZ78_11715	P
TSS-597	CP054306	2526090	-	HTZ78_11805	A
TSS-598	CP054306	2528969	+	HTZ78_11825	P
TSS-599	CP054306	2530985	+	HTZ78_11845	P
TSS-600	CP054306	2548156	-	HTZ78_11945	P
TSS-601	CP054306	2548262	-	HTZ78_11945	S
TSS-602	CP054306	2552256	+	HTZ78_11965	P
TSS-603	CP054306	2554741	-	HTZ78_11975	I
TSS-604	CP054306	2554907	+	HTZ78_11980	S
TSS-605	CP054306	2554956	+	HTZ78_11980	P
TSS-606	CP054306	2555107	-	HTZ78_11975	P
TSS-607	CP054306	2559598	-	HTZ78_11990	P
TSS-608	CP054306	2574646	+	HTZ78_12075	P
TSS-609	CP054306	2581899	-	HTZ78_12095	S
TSS-610	CP054306	2581930	-	HTZ78_12095	P
TSS-611	CP054306	2585816	-	HTZ78_12120	P
TSS-612	CP054306	2593098	-	HTZ78_12150	P
TSS-613	CP054306	2595185	-	HTZ78_12160	P
TSS-614	CP054306	2600501	+	HTZ78_12185	A
TSS-615	CP054306	2606691	-	HTZ78_12205	P
TSS-616	CP054306	2606828	+	HTZ78_12210	P
TSS-617	CP054306	2612028	+	HTZ78_12220	P
TSS-618	CP054306	2616483	+	HTZ78_12240	P
TSS-619	CP054306	2618057	-	HTZ78_12250	P
TSS-620	CP054306	2619008	-	HTZ78_12255	P
TSS-621	CP054306	2621998	+	HTZ78_12270	P
TSS-622	CP054306	2634716	-	HTZ78_12315	P
TSS-623	CP054306	2635226	-	HTZ78_12320	P
TSS-624	CP054306	2647334	-	HTZ78_12380	P
TSS-625	CP054306	2652282	-	HTZ78_12415	P
TSS-626	CP054306	2672993	+	HTZ78_12495	S
TSS-627	CP054306	2673032	+	HTZ78_12495	P
TSS-628	CP054306	2690027	-	HTZ78_12550	P
TSS-629	CP054306	2696406	+	HTZ78_12575	A
TSS-630	CP054306	2697799	-	HTZ78_12575	P
TSS-631	CP054306	2699019	+	HTZ78_12585	P
TSS-632	CP054306	2702138	-	HTZ78_12595	P
TSS-633	CP054306	2703361	-	HTZ78_12600	P
TSS-634	CP054306	2703523	+	HTZ78_12605	P
TSS-635	CP054306	2709631	+	HTZ78_12630	P
TSS-636	CP054306	2718696	+	HTZ78_12670	P
TSS-637	CP054306	2721321	+	HTZ78_12680	I
TSS-638	CP054306	2726004	-	HTZ78_12700	P
TSS-639	CP054306	2730386	-	HTZ78_12725	P
TSS-640	CP054306	2732278	+	HTZ78_12740	P
TSS-641	CP054306	2734862	+	HTZ78_12750	P
TSS-642	CP054306	2748189	-	HTZ78_12815	P
TSS-643	CP054306	2748289	+	HTZ78_12820	P
TSS-644	CP054306	2748958	-	HTZ78_12825	A
TSS-645	CP054306	2750845	+	-	N
TSS-646	CP054306	2755755	-	HTZ78_12860	P
TSS-647	CP054306	2761391	+	-	N
TSS-648	CP054306	2762530	+	HTZ78_12890	S
TSS-649	CP054306	2762632	+	HTZ78_12890	P
TSS-650	CP054306	2769029	+	HTZ78_12915	P
TSS-651	CP054306	2773217	+	HTZ78_12940	P
TSS-652	CP054306	2782170	-	HTZ78_12970	P
TSS-653	CP054306	2784120	-	HTZ78_12980	P
TSS-654	CP054306	2784476	-	HTZ78_12980	S
TSS-655	CP054306	2786121	-	HTZ78_12990	P
TSS-656	CP054306	2789755	+	HTZ78_13020	P
TSS-657	CP054306	2794677	+	HTZ78_13040	P
TSS-658	CP054306	2797055	+	HTZ78_13050	P
TSS-659	CP054306	2798181	+	HTZ78_13060	P
TSS-660	CP054306	2803624	-	HTZ78_13075	P
TSS-661	CP054306	2809165	+	HTZ78_13095	P
TSS-662	CP054306	2812750	-	HTZ78_13105	P
TSS-663	CP054306	2815429	+	HTZ78_13125	P
TSS-664	CP054306	2819803	-	HTZ78_13145	P
TSS-665	CP054306	2822332	-	-	N
TSS-666	CP054306	2822355	+	HTZ78_13160	P
TSS-667	CP054306	2836248	-	HTZ78_13185	P
TSS-668	CP054306	2842652	-	HTZ78_13205	P
TSS-669	CP054306	2846968	-	HTZ78_13215	P
TSS-670	CP054306	2854365	+	HTZ78_13260	S
TSS-671	CP054306	2854445	+	HTZ78_13260	P
TSS-672	CP054306	2859123	-	HTZ78_13285	P
TSS-673	CP054306	2863049	-	HTZ78_13300	P
TSS-674	CP054306	2866899	+	HTZ78_13330	P
TSS-675	CP054306	2867868	+	HTZ78_13335	P
TSS-676	CP054306	2869100	+	HTZ78_13345	P
TSS-677	CP054306	2879783	-	HTZ78_13375	P
TSS-678	CP054306	2882760	+	HTZ78_13390	P
TSS-679	CP054306	2898940	-	HTZ78_13465	P
TSS-680	CP054306	2899227	+	HTZ78_13470	P
TSS-681	CP054306	2913544	+	HTZ78_13535	A
TSS-682	CP054306	2921936	-	HTZ78_13560	P
TSS-683	CP054306	2927024	+	HTZ78_13575	P
TSS-684	CP054306	2927976	-	HTZ78_13580	A
TSS-685	CP054306	2930829	-	HTZ78_13585	P
TSS-686	CP054306	2935873	-	HTZ78_13615	P
TSS-687	CP054306	2936312	-	HTZ78_13620	P
TSS-688	CP054306	2937026	+	HTZ78_13630	P
TSS-689	CP054306	2938067	+	HTZ78_13635	P
TSS-690	CP054306	2944826	-	HTZ78_13665	P
TSS-691	CP054306	2953706	-	HTZ78_13695	P
TSS-692	CP054306	2953924	+	HTZ78_13700	P
TSS-693	CP054306	2954287	-	HTZ78_13705	A
TSS-694	CP054306	2957910	+	HTZ78_13725	P
TSS-695	CP054306	2962117	+	HTZ78_13745	P
TSS-696	CP054306	2965522	-	HTZ78_13760	P
TSS-697	CP054306	2967676	-	HTZ78_13770	I
TSS-698	CP054306	2976961	+	HTZ78_13815	P
TSS-699	CP054306	2979996	+	-	N
TSS-700	CP054306	3003286	-	HTZ78_13950	A
TSS-701	CP054306	3005903	-	HTZ78_13970	P
TSS-702	CP054306	3013220	-	HTZ78_13995	P
TSS-703	CP054306	3015560	-	HTZ78_14005	P
TSS-704	CP054306	3017807	-	HTZ78_14015	P
TSS-705	CP054306	3020725	-	HTZ78_14035	P
TSS-706	CP054306	3020782	+	HTZ78_14040	P
TSS-707	CP054306	3022589	-	HTZ78_14050	P
TSS-708	CP054306	3023529	+	HTZ78_14055	A
TSS-709	CP054306	3033644	-	HTZ78_14125	P
TSS-710	CP054306	3035640	-	HTZ78_14130	P
TSS-711	CP054306	3042051	-	HTZ78_14160	P
TSS-712	CP054306	3043870	+	HTZ78_14165	A
TSS-713	CP054306	3045696	+	HTZ78_14175	P
TSS-714	CP054306	3048367	+	HTZ78_14185	P
TSS-715	CP054306	3049029	+	HTZ78_14190	P
TSS-716	CP054306	3054469	+	HTZ78_14230	P
TSS-717	CP054306	3057531	-	HTZ78_14240	P
TSS-718	CP054306	3064237	+	HTZ78_14270	A
TSS-719	CP054306	3065146	-	HTZ78_14270	I
TSS-720	CP054306	3065164	+	HTZ78_14275	P
TSS-721	CP054306	3084508	+	HTZ78_14380	P
TSS-722	CP054306	3085244	+	HTZ78_14395	P
TSS-723	CP054306	3090493	+	HTZ78_14420	P
TSS-724	CP054306	3100484	+	HTZ78_14460	A
TSS-725	CP054306	3101383	-	HTZ78_14460	P
TSS-726	CP054306	3107963	-	HTZ78_14490	P
TSS-727	CP054306	3109257	+	HTZ78_14500	P
TSS-728	CP054306	3113310	+	HTZ78_14530	P
TSS-729	CP054306	3116373	-	HTZ78_14535	P
TSS-730	CP054306	3118662	+	HTZ78_14555	P
TSS-731	CP054306	3120595	+	HTZ78_14570	P
TSS-732	CP054306	3124282	+	HTZ78_14590	P
TSS-733	CP054306	3128989	+	HTZ78_14620	P
TSS-734	CP054306	3136591	+	HTZ78_14665	P
TSS-735	CP054306	3143134	+	HTZ78_14685	I
TSS-736	CP054306	3148158	-	HTZ78_14705	I
TSS-737	CP054306	3163802	-	HTZ78_14775	P
TSS-738	CP054306	3164111	+	HTZ78_14780	P
TSS-739	CP054306	3185678	+	HTZ78_14855	P
TSS-740	CP054306	3186201	-	HTZ78_14860	P
TSS-741	CP054306	3199245	-	HTZ78_14925	P
TSS-742	CP054306	3208450	+	HTZ78_14970	P
TSS-743	CP054306	3210353	-	HTZ78_14990	P
TSS-744	CP054306	3212353	+	HTZ78_15000	A
TSS-745	CP054306	3222162	-	HTZ78_15040	P
TSS-746	CP054306	3224345	-	HTZ78_15055	S
TSS-747	CP054306	3224448	-	HTZ78_15055	P
TSS-748	CP054306	3233728	-	HTZ78_15100	P
TSS-749	CP054306	3235123	-	HTZ78_15105	P
TSS-750	CP054306	3237197	+	HTZ78_15125	P
TSS-751	CP054306	3244901	+	HTZ78_15135	P
TSS-752	CP054306	3249971	-	HTZ78_15150	P
TSS-753	CP054306	3250263	+	HTZ78_15155	P
TSS-754	CP054306	3258259	+	HTZ78_15190	P
TSS-755	CP054306	3259734	+	HTZ78_15195	P
TSS-756	CP054306	3266877	-	HTZ78_15220	P
TSS-757	CP054306	3266966	+	-	N
TSS-758	CP054306	3268763	+	HTZ78_15230	A
TSS-759	CP054306	3276902	+	HTZ78_15280	P
TSS-760	CP054306	3279362	+	HTZ78_15300	P
TSS-761	CP054306	3282176	+	HTZ78_15305	P
TSS-762	CP054306	3288201	-	HTZ78_15330	P
TSS-763	CP054306	3288341	+	HTZ78_15335	P
TSS-764	CP054306	3298757	-	HTZ78_15360	A
TSS-765	CP054306	3299395	+	HTZ78_15365	P
TSS-766	CP054306	3307129	-	HTZ78_15395	P
TSS-767	CP054306	3311866	-	HTZ78_15425	P
TSS-768	CP054306	3315430	-	HTZ78_15435	P
TSS-769	CP054306	3318627	+	HTZ78_15450	P
TSS-770	CP054306	3322379	-	HTZ78_15470	P
TSS-771	CP054306	3327239	+	HTZ78_15490	P
TSS-772	CP054306	3343934	-	HTZ78_15555	P
TSS-773	CP054306	3346149	-	HTZ78_15565	P
TSS-774	CP054306	3349977	+	HTZ78_15580	P
TSS-775	CP054306	3350606	+	HTZ78_15585	P
TSS-776	CP054306	3354318	+	HTZ78_15600	P
TSS-777	CP054306	3358770	-	HTZ78_15610	P
TSS-778	CP054306	3359383	+	HTZ78_15615	A
TSS-779	CP054306	3362189	-	HTZ78_15635	P
TSS-780	CP054306	3362560	+	HTZ78_15645	P
TSS-781	CP054306	3364538	+	HTZ78_15660	P
TSS-782	CP054306	3365725	+	HTZ78_15670	P
TSS-783	CP054306	3369532	-	HTZ78_15695	P
TSS-784	CP054306	3371250	+	HTZ78_15720	P
TSS-785	CP054306	3372636	-	HTZ78_15725	P
TSS-786	CP054306	3380822	-	HTZ78_15770	P
TSS-787	CP054306	3386217	-	HTZ78_15805	P
TSS-788	CP054306	3386375	+	HTZ78_15810	S
TSS-789	CP054306	3386522	+	HTZ78_15810	P
TSS-790	CP054306	3388209	+	HTZ78_15820	P
TSS-791	CP054306	3389013	+	HTZ78_15825	P
TSS-792	CP054306	3395396	+	HTZ78_15860	P
TSS-793	CP054306	3400398	-	HTZ78_15880	P
TSS-794	CP054306	3400785	+	HTZ78_15885	P
TSS-795	CP054306	3419892	-	HTZ78_15955	S
TSS-796	CP054306	3420028	-	HTZ78_15955	P
TSS-797	CP054306	3422712	+	HTZ78_15970	P
TSS-798	CP054306	3433203	+	HTZ78_16020	P
TSS-799	CP054306	3438965	+	-	N
TSS-800	CP054306	3440461	-	HTZ78_16045	P
TSS-801	CP054306	3445049	-	HTZ78_16070	A
TSS-802	CP054306	3445711	+	HTZ78_16080	P
TSS-803	CP054306	3446969	+	HTZ78_16090	P
TSS-804	CP054306	3451833	-	HTZ78_16115	P
TSS-805	CP054306	3451981	+	-	N
TSS-806	CP054306	3452010	+	-	N
TSS-807	CP054306	3454242	-	HTZ78_16125	P
TSS-808	CP054306	3454531	+	HTZ78_16130	P
TSS-809	CP054306	3460673	+	HTZ78_16150	P
TSS-810	CP054306	3460693	-	HTZ78_16145	P
TSS-811	CP054306	3464179	-	HTZ78_16170	P
TSS-812	CP054306	3464219	-	HTZ78_16170	S
TSS-813	CP054306	3464535	+	HTZ78_16175	P
TSS-814	CP054306	3471892	-	HTZ78_16205	P
TSS-815	CP054306	3474845	-	HTZ78_16215	P
TSS-816	CP054306	3476510	+	HTZ78_16230	P
TSS-817	CP054306	3479839	-	HTZ78_16245	P
TSS-818	CP054306	3485463	+	HTZ78_16275	P
TSS-819	CP054306	3493315	+	HTZ78_16295	A
TSS-820	CP054306	3493732	-	HTZ78_16295	P
TSS-821	CP054306	3500743	-	HTZ78_16340	P
TSS-822	CP054306	3514218	-	HTZ78_16415	P
TSS-823	CP054306	3514407	-	HTZ78_16415	S
TSS-824	CP054306	3514993	+	HTZ78_16420	A
TSS-825	CP054306	3518148	-	HTZ78_16435	P
TSS-826	CP054306	3521906	-	HTZ78_16450	P
TSS-827	CP054306	3524617	+	HTZ78_16465	P
TSS-828	CP054306	3529927	+	HTZ78_16485	A
TSS-829	CP054306	3530122	-	HTZ78_16485	P
TSS-830	CP054306	3539521	+	HTZ78_16520	A
TSS-831	CP054306	3540170	-	HTZ78_16520	P
TSS-832	CP054306	3541528	-	HTZ78_16525	P
TSS-833	CP054306	3546121	+	HTZ78_16545	P
TSS-834	CP054306	3551785	-	HTZ78_16570	I
TSS-835	CP054306	3552111	-	HTZ78_16570	P
TSS-836	CP054306	3554189	-	HTZ78_16580	P
TSS-837	CP054306	3555459	-	HTZ78_16590	P
TSS-838	CP054306	3560428	+	HTZ78_16620	P
TSS-839	CP054306	3566333	+	HTZ78_16640	P
TSS-840	CP054306	3568016	+	HTZ78_16650	P
TSS-841	CP054306	3573596	+	HTZ78_16660	P
TSS-842	CP054306	3583648	-	HTZ78_16700	P
TSS-843	CP054306	3592044	+	HTZ78_16745	P
TSS-844	CP054306	3598227	+	HTZ78_16775	P
TSS-845	CP054306	3610979	+	HTZ78_16875	A
TSS-846	CP054306	3614815	-	HTZ78_16875	P
TSS-847	CP054306	3615032	+	HTZ78_16880	P
TSS-848	CP054306	3619978	-	-	N
TSS-849	CP054306	3623001	-	HTZ78_16915	A
TSS-850	CP054306	3625926	+	HTZ78_16925	P
TSS-851	CP054306	3636939	-	HTZ78_16965	P
TSS-852	CP054306	3639977	-	HTZ78_16985	P
TSS-853	CP054306	3649215	+	HTZ78_17040	P
TSS-854	CP054306	3650914	+	HTZ78_17055	P
TSS-855	CP054306	3651019	+	HTZ78_17055	S
TSS-856	CP054306	3656465	-	HTZ78_17080	P
TSS-857	CP054306	3656666	+	HTZ78_17085	P
TSS-858	CP054306	3665040	-	HTZ78_17125	P
TSS-859	CP054306	3666395	-	HTZ78_17130	P
TSS-860	CP054306	3669264	-	HTZ78_17145	P
TSS-861	CP054306	3671081	-	HTZ78_17150	P
TSS-862	CP054306	3671399	+	HTZ78_17155	P
TSS-863	CP054306	3672048	-	HTZ78_17155	A
TSS-864	CP054306	3672460	+	HTZ78_17160	P
TSS-865	CP054306	3682693	+	HTZ78_17190	A
TSS-866	CP054306	3684745	+	HTZ78_17205	P
TSS-867	CP054306	3688188	+	HTZ78_17215	A
TSS-868	CP054306	3689218	-	HTZ78_17215	P
TSS-869	CP054306	3693540	-	HTZ78_17240	P
TSS-870	CP054307	1521	-	HTZ78_17290	P
TSS-871	CP054307	1599	-	HTZ78_17290	S
TSS-872	CP054307	7012	+	HTZ78_17325	P
TSS-873	CP054307	23413	+	HTZ78_17415	P
TSS-874	CP054307	24432	-	HTZ78_17425	P
TSS-875	CP054307	24465	-	HTZ78_17425	S
TSS-876	CP054307	24728	+	HTZ78_17430	P
TSS-877	CP054307	29498	+	HTZ78_17455	P
TSS-878	CP054307	33675	+	HTZ78_17480	P
TSS-879	CP054307	33682	-	HTZ78_17475	P
TSS-880	CP054307	38345	-	HTZ78_17505	P
TSS-881	CP054307	38824	-	HTZ78_17510	I
TSS-882	CP054307	39304	-	HTZ78_17510	P
TSS-883	CP054307	39439	+	HTZ78_17515	P
TSS-884	CP054307	52729	-	-	N
TSS-885	CP054307	69890	-	-	N
TSS-886	CP054307	77331	-	HTZ78_17685	P
TSS-887	CP054308	8533	+	HTZ78_17755	P
TSS-888	CP054308	12230	+	HTZ78_17765	P
TSS-889	CP054308	18745	-	HTZ78_17800	P
TSS-890	CP054308	19063	+	HTZ78_17805	P
TSS-891	CP054308	31665	-	HTZ78_17865	S
TSS-892	CP054308	31694	-	HTZ78_17865	P
TSS-893	CP054308	32896	-	HTZ78_17875	P
TSS-894	CP054308	37372	-	HTZ78_17900	P
TSS-895	CP054308	42069	-	HTZ78_17930	I
TSS-896	CP054308	42529	-	HTZ78_17930	P
TSS-897	CP054309	785	+	HTZ78_17945	P
