# Supplementary material for: Multi-Omic Analyses Reveal Habitat Adaptation of Marine Cyanobacterium Synechocystis sp. PCC 7338
Source: Front Microbiol. 2021 May 13;12:667450. doi: 10.3389/fmicb.2021.667450 (PMC8155712; doi:10.3389/fmicb.2021.667450)
Supplement: Supplementary file 3 [file Data_Sheet_2.XLSX]

## Sheet: Sheet1
Supplementary Data S2. Identified TEPs in Synechocystis sp. PCC 7338
TEP ID	Locus	Position	Strand	Associated gene	Category
TEP-001	CP054306	13675	-	HTZ78_00090	I
TEP-002	CP054306	22917	+	HTZ78_00130	P
TEP-003	CP054306	24191	-	tRNA1-Ser	P
TEP-004	CP054306	26364	+	HTZ78_00150	P
TEP-005	CP054306	31282	-	HTZ78_00190	P
TEP-006	CP054306	36153	+	tRNA2-Thr	P
TEP-007	CP054306	50896	-	HTZ78_00280	P
TEP-008	CP054306	57209	+	tRNA3-Asp	P
TEP-009	CP054306	61545	+	HTZ78_00330	S
TEP-010	CP054306	61607	+	HTZ78_00330	S
TEP-011	CP054306	61767	+	HTZ78_00330	P
TEP-012	CP054306	65146	-	HTZ78_00365	P
TEP-013	CP054306	65176	+	HTZ78_00360	P
TEP-014	CP054306	69920	-	HTZ78_00380	I
TEP-015	CP054306	74364	+	HTZ78_00405	A
TEP-016	CP054306	78246	+	HTZ78_00415	P
TEP-017	CP054306	78304	+	HTZ78_00415	S
TEP-018	CP054306	102005	+	tRNA4-Arg	P
TEP-019	CP054306	105459	-	HTZ78_00605	P
TEP-020	CP054306	109697	+	HTZ78_00620	P
TEP-021	CP054306	110423	-	HTZ78_00640	P
TEP-022	CP054306	120887	-	tRNA5-Gly	P
TEP-023	CP054306	128273	-	HTZ78_00720	P
TEP-024	CP054306	130680	-	HTZ78_00735	P
TEP-025	CP054306	134749	-	HTZ78_00755	P
TEP-026	CP054306	137800	-	HTZ78_00765	S
TEP-027	CP054306	137934	-	HTZ78_00765	P
TEP-028	CP054306	138343	+	HTZ78_00760	P
TEP-029	CP054306	138692	+	HTZ78_00760	S
TEP-030	CP054306	139137	-	HTZ78_00770	P
TEP-031	CP054306	141086	+	HTZ78_00780	A
TEP-032	CP054306	162892	+	HTZ78_00855	P
TEP-033	CP054306	169383	+	HTZ78_00870	P
TEP-034	CP054306	178418	-	HTZ78_00935	P
TEP-035	CP054306	188347	-	HTZ78_00995	P
TEP-036	CP054306	190242	-	HTZ78_01005	I
TEP-037	CP054306	190373	+	HTZ78_01010	U
TEP-038	CP054306	206761	+	HTZ78_01085	P
TEP-039	CP054306	209784	+	-	N
TEP-040	CP054306	216826	-	-	N
TEP-041	CP054306	217108	+	-	N
TEP-042	CP054306	240721	-	tRNA8-Pro	P
TEP-043	CP054306	245036	+	HTZ78_01265	P
TEP-044	CP054306	247051	-	-	N
TEP-045	CP054306	256951	+	HTZ78_01310	P
TEP-046	CP054306	268301	-	HTZ78_01370	P
TEP-047	CP054306	274466	-	HTZ78_01390	P
TEP-048	CP054306	277345	+	HTZ78_01400	S
TEP-049	CP054306	277383	+	HTZ78_01400	P
TEP-050	CP054306	302118	+	HTZ78_01515	P
TEP-051	CP054306	303960	-	HTZ78_01525	P
TEP-052	CP054306	326608	-	HTZ78_01640	P
TEP-053	CP054306	333221	-	HTZ78_01675	P
TEP-054	CP054306	334504	-	HTZ78_01680	U
TEP-055	CP054306	336516	+	HTZ78_01690	S
TEP-056	CP054306	336552	+	HTZ78_01690	P
TEP-057	CP054306	338407	+	HTZ78_01700	P
TEP-058	CP054306	338903	+	HTZ78_01705	P
TEP-059	CP054306	339750	+	HTZ78_01710	A
TEP-060	CP054306	347735	-	HTZ78_01735	A
TEP-061	CP054306	356946	+	HTZ78_01785	A
TEP-062	CP054306	360879	+	HTZ78_01805	A
TEP-063	CP054306	368992	-	HTZ78_01830	I
TEP-064	CP054306	381057	+	HTZ78_01875	P
TEP-065	CP054306	381851	+	HTZ78_01880	P
TEP-066	CP054306	419533	-	HTZ78_02035	I
TEP-067	CP054306	426817	-	HTZ78_02060	S
TEP-068	CP054306	426857	-	HTZ78_02060	P
TEP-069	CP054306	431149	-	HTZ78_02090	P
TEP-070	CP054306	432913	-	HTZ78_02100	P
TEP-071	CP054306	470649	-	HTZ78_02250	P
TEP-072	CP054306	513456	-	HTZ78_02460	P
TEP-073	CP054306	514477	+	tRNA9-Ala	P
TEP-074	CP054306	517414	+	HTZ78_02485	A
TEP-075	CP054306	531767	+	HTZ78_02540	P
TEP-076	CP054306	533005	-	HTZ78_02555	P
TEP-077	CP054306	540635	+	HTZ78_02585	P
TEP-078	CP054306	546673	-	HTZ78_02615	P
TEP-079	CP054306	547408	-	HTZ78_02615	U
TEP-080	CP054306	548904	-	tRNA10-Lys	P
TEP-081	CP054306	565414	+	HTZ78_02695	A
TEP-082	CP054306	573132	-	tRNA11-Cys	P
TEP-083	CP054306	577002	-	HTZ78_02765	P
TEP-084	CP054306	577041	+	HTZ78_02760	P
TEP-085	CP054306	590870	-	HTZ78_02835	P
TEP-086	CP054306	595939	-	HTZ78_02870	P
TEP-087	CP054306	604843	+	HTZ78_02900	S
TEP-088	CP054306	604910	+	HTZ78_02900	P
TEP-089	CP054306	606366	+	HTZ78_02905	P
TEP-090	CP054306	610496	+	HTZ78_02920	P
TEP-091	CP054306	639707	+	HTZ78_03045	I
TEP-092	CP054306	642463	-	HTZ78_03060	P
TEP-093	CP054306	669134	-	HTZ78_03180	P
TEP-094	CP054306	687992	-	HTZ78_03260	I
TEP-095	CP054306	696309	+	HTZ78_03290	P
TEP-096	CP054306	698122	-	HTZ78_03310	P
TEP-097	CP054306	698238	+	HTZ78_03305	P
TEP-098	CP054306	698302	+	HTZ78_03305	S
TEP-099	CP054306	714126	-	HTZ78_03395	P
TEP-100	CP054306	723752	-	HTZ78_03430	P
TEP-101	CP054306	724106	+	HTZ78_03425	P
TEP-102	CP054306	748141	-	HTZ78_03540	A
TEP-103	CP054306	751319	+	HTZ78_03555	P
TEP-104	CP054306	752791	+	HTZ78_03565	P
TEP-105	CP054306	756315	-	HTZ78_03590	A
TEP-106	CP054306	759404	+	HTZ78_03605	P
TEP-107	CP054306	763227	+	HTZ78_03630	P
TEP-108	CP054306	786232	+	HTZ78_03725	P
TEP-109	CP054306	799250	+	HTZ78_03795	P
TEP-110	CP054306	819303	+	HTZ78_03875	I
TEP-111	CP054306	824435	-	HTZ78_03905	I
TEP-112	CP054306	827301	+	HTZ78_03920	P
TEP-113	CP054306	844770	-	-	N
TEP-114	CP054306	845173	+	HTZ78_04010	I
TEP-115	CP054306	845481	+	HTZ78_04010	P
TEP-116	CP054306	857432	-	HTZ78_04065	P
TEP-117	CP054306	866760	+	HTZ78_04115	P
TEP-118	CP054306	868388	-	HTZ78_04135	P
TEP-119	CP054306	868458	+	tRNA13-Val	P
TEP-120	CP054306	871510	+	HTZ78_04140	U
TEP-121	CP054306	924798	-	HTZ78_04480	P
TEP-122	CP054306	932310	-	HTZ78_04515	P
TEP-123	CP054306	936190	+	HTZ78_04525	P
TEP-124	CP054306	947437	-	HTZ78_04565	A
TEP-125	CP054306	957111	+	HTZ78_04615	U
TEP-126	CP054306	957656	+	HTZ78_04615	P
TEP-127	CP054306	970520	+	HTZ78_04690	U
TEP-128	CP054306	971449	-	HTZ78_04695	P
TEP-129	CP054306	971483	+	HTZ78_04690	P
TEP-130	CP054306	974657	-	HTZ78_04715	P
TEP-131	CP054306	978225	-	-	N
TEP-132	CP054306	978407	-	-	N
TEP-133	CP054306	978632	+	HTZ78_04735	U
TEP-134	CP054306	981830	+	HTZ78_04755	P
TEP-135	CP054306	983399	-	HTZ78_04760	I
TEP-136	CP054306	1007732	-	HTZ78_04870	A
TEP-137	CP054306	1010345	-	HTZ78_04890	P
TEP-138	CP054306	1011413	-	HTZ78_04895	P
TEP-139	CP054306	1014634	-	HTZ78_04915	P
TEP-140	CP054306	1015065	-	HTZ78_04920	P
TEP-141	CP054306	1022422	+	HTZ78_04950	P
TEP-142	CP054306	1042419	+	HTZ78_05050	U
TEP-143	CP054306	1042990	-	HTZ78_05055	P
TEP-144	CP054306	1043031	+	HTZ78_05050	P
TEP-145	CP054306	1068089	+	HTZ78_05190	A
TEP-146	CP054306	1074277	+	tRNA14-Arg	P
TEP-147	CP054306	1074848	+	HTZ78_05225	P
TEP-148	CP054306	1074986	-	HTZ78_05235	P
TEP-149	CP054306	1075016	-	HTZ78_05235	S
TEP-150	CP054306	1076397	+	HTZ78_05240	P
TEP-151	CP054306	1084001	+	HTZ78_05265	P
TEP-152	CP054306	1088978	-	HTZ78_05295	P
TEP-153	CP054306	1104609	+	HTZ78_05370	P
TEP-154	CP054306	1122438	+	HTZ78_05450	P
TEP-155	CP054306	1122453	-	HTZ78_05455	P
TEP-156	CP054306	1126945	+	HTZ78_05485	P
TEP-157	CP054306	1129480	+	HTZ78_05500	U
TEP-158	CP054306	1153012	+	HTZ78_05575	P
TEP-159	CP054306	1164508	+	HTZ78_05630	A
TEP-160	CP054306	1181425	-	HTZ78_05705	P
TEP-161	CP054306	1181836	+	HTZ78_05705	A
TEP-162	CP054306	1193462	-	HTZ78_05775	I
TEP-163	CP054306	1207504	+	HTZ78_05835	P
TEP-164	CP054306	1210945	-	HTZ78_05860	P
TEP-165	CP054306	1217964	+	HTZ78_05890	A
TEP-166	CP054306	1227704	+	HTZ78_05930	I
TEP-167	CP054306	1245458	-	tRNA15-Val	P
TEP-168	CP054306	1276814	-	-	N
TEP-169	CP054306	1280277	-	HTZ78_06190	P
TEP-170	CP054306	1321054	-	HTZ78_06345	P
TEP-171	CP054306	1324543	+	HTZ78_06355	A
TEP-172	CP054306	1328624	+	HTZ78_06370	P
TEP-173	CP054306	1329272	-	HTZ78_06380	S
TEP-174	CP054306	1329328	-	HTZ78_06380	P
TEP-175	CP054306	1331197	+	HTZ78_06390	A
TEP-176	CP054306	1343798	+	HTZ78_06460	U
TEP-177	CP054306	1369761	-	-	N
TEP-178	CP054306	1373061	-	HTZ78_06550	A
TEP-179	CP054306	1375014	+	HTZ78_06560	P
TEP-180	CP054306	1386591	+	HTZ78_06630	P
TEP-181	CP054306	1397393	-	HTZ78_06660	P
TEP-182	CP054306	1400720	+	HTZ78_06675	P
TEP-183	CP054306	1407856	+	HTZ78_06720	U
TEP-184	CP054306	1430810	+	HTZ78_06805	P
TEP-185	CP054306	1437550	+	HTZ78_06830	P
TEP-186	CP054306	1439536	+	HTZ78_06840	P
TEP-187	CP054306	1442591	+	HTZ78_06855	P
TEP-188	CP054306	1451316	-	HTZ78_06915	P
TEP-189	CP054306	1472029	+	HTZ78_06980	P
TEP-190	CP054306	1480991	+	-	N
TEP-191	CP054306	1486841	-	HTZ78_07050	A
TEP-192	CP054306	1494315	-	HTZ78_07105	P
TEP-193	CP054306	1500599	-	-	N
TEP-194	CP054306	1505706	+	HTZ78_07165	P
TEP-195	CP054306	1516652	+	HTZ78_07215	P
TEP-196	CP054306	1523386	-	HTZ78_07245	A
TEP-197	CP054306	1525036	+	HTZ78_07250	P
TEP-198	CP054306	1528626	+	HTZ78_07275	I
TEP-199	CP054306	1542249	+	tRNA16-Ser	P
TEP-200	CP054306	1556282	+	HTZ78_07375	A
TEP-201	CP054306	1557715	-	tRNA17-Gly	P
TEP-202	CP054306	1564153	-	HTZ78_07425	S
TEP-203	CP054306	1564246	-	HTZ78_07425	P
TEP-204	CP054306	1570961	+	HTZ78_07460	P
TEP-205	CP054306	1571611	+	HTZ78_07465	P
TEP-206	CP054306	1573526	+	HTZ78_07470	P
TEP-207	CP054306	1575391	+	HTZ78_07480	P
TEP-208	CP054306	1585498	-	tRNA18-Arg	P
TEP-209	CP054306	1585570	+	HTZ78_07530	U
TEP-210	CP054306	1592302	+	HTZ78_07550	I
TEP-211	CP054306	1609268	+	HTZ78_07615	P
TEP-212	CP054306	1619290	-	tRNA19-Ala	P
TEP-213	CP054306	1621851	+	HTZ78_07665	P
TEP-214	CP054306	1639114	-	HTZ78_07745	P
TEP-215	CP054306	1645059	+	HTZ78_07765	P
TEP-216	CP054306	1646641	+	HTZ78_07775	A
TEP-217	CP054306	1654544	-	HTZ78_07810	P
TEP-218	CP054306	1656667	-	HTZ78_07820	P
TEP-219	CP054306	1667247	-	HTZ78_07870	P
TEP-220	CP054306	1672166	+	HTZ78_07880	P
TEP-221	CP054306	1684460	+	tRNA20-Leu	P
TEP-222	CP054306	1692923	-	HTZ78_07965	P
TEP-223	CP054306	1695235	+	HTZ78_07975	P
TEP-224	CP054306	1695540	+	HTZ78_07980	I
TEP-225	CP054306	1700242	+	HTZ78_08005	P
TEP-226	CP054306	1701758	-	HTZ78_08025	P
TEP-227	CP054306	1715424	-	HTZ78_08100	P
TEP-228	CP054306	1715648	+	HTZ78_08095	P
TEP-229	CP054306	1722353	+	HTZ78_08140	I
TEP-230	CP054306	1734662	+	HTZ78_08180	P
TEP-231	CP054306	1738122	-	HTZ78_08200	P
TEP-232	CP054306	1758812	-	HTZ78_08305	P
TEP-233	CP054306	1762550	-	tRNA22-Ala	P
TEP-234	CP054306	1762620	+	HTZ78_08325	P
TEP-235	CP054306	1768493	-	HTZ78_08360	P
TEP-236	CP054306	1769926	-	HTZ78_08365	A
TEP-237	CP054306	1771970	+	HTZ78_08370	I
TEP-238	CP054306	1774070	-	HTZ78_08380	A
TEP-239	CP054306	1779081	-	HTZ78_08400	P
TEP-240	CP054306	1779343	-	HTZ78_08405	P
TEP-241	CP054306	1795977	+	HTZ78_08490	I
TEP-242	CP054306	1797883	-	HTZ78_08500	I
TEP-243	CP054306	1826243	-	HTZ78_08600	P
TEP-244	CP054306	1839573	+	tRNA23-Leu	P
TEP-245	CP054306	1841731	-	HTZ78_08680	A
TEP-246	CP054306	1847417	+	HTZ78_08695	P
TEP-247	CP054306	1853205	+	HTZ78_08730	I
TEP-248	CP054306	1853586	+	HTZ78_08730	P
TEP-249	CP054306	1858064	-	-	N
TEP-250	CP054306	1859741	+	HTZ78_08755	P
TEP-251	CP054306	1867839	+	HTZ78_08785	S
TEP-252	CP054306	1867891	+	HTZ78_08785	P
TEP-253	CP054306	1877458	-	HTZ78_08860	S
TEP-254	CP054306	1877528	-	HTZ78_08860	P
TEP-255	CP054306	1884201	+	HTZ78_08880	S
TEP-256	CP054306	1884253	+	HTZ78_08880	P
TEP-257	CP054306	1885718	-	HTZ78_08885	A
TEP-258	CP054306	1895068	-	HTZ78_08920	P
TEP-259	CP054306	1896657	-	tRNA24-Gln	P
TEP-260	CP054306	1901553	+	tRNA25-Asn	P
TEP-261	CP054306	1911175	-	HTZ78_09005	P
TEP-262	CP054306	1946635	-	HTZ78_09155	P
TEP-263	CP054306	1947411	-	HTZ78_09160	P
TEP-264	CP054306	1956888	+	HTZ78_09185	P
TEP-265	CP054306	1965703	+	HTZ78_09225	U
TEP-266	CP054306	1973960	-	HTZ78_09255	P
TEP-267	CP054306	1992358	+	tRNA26-Ile2	P
TEP-268	CP054306	2003210	+	HTZ78_09390	P
TEP-269	CP054306	2017267	+	-	N
TEP-270	CP054306	2021453	-	HTZ78_09480	P
TEP-271	CP054306	2033660	+	HTZ78_09510	P
TEP-272	CP054306	2039630	-	HTZ78_09550	P
TEP-273	CP054306	2066421	-	HTZ78_09675	P
TEP-274	CP054306	2086030	-	HTZ78_09760	I
TEP-275	CP054306	2109626	-	HTZ78_09865	P
TEP-276	CP054306	2111014	-	HTZ78_09870	P
TEP-277	CP054306	2127686	+	HTZ78_09930	U
TEP-278	CP054306	2129194	+	HTZ78_09935	P
TEP-279	CP054306	2155445	+	HTZ78_10075	U
TEP-280	CP054306	2158751	-	HTZ78_10090	A
TEP-281	CP054306	2168076	-	HTZ78_10125	P
TEP-282	CP054306	2181823	-	HTZ78_10195	P
TEP-283	CP054306	2182666	-	HTZ78_10200	I
TEP-284	CP054306	2210395	+	HTZ78_10350	P
TEP-285	CP054306	2216119	+	HTZ78_10370	P
TEP-286	CP054306	2216173	+	HTZ78_10370	S
TEP-287	CP054306	2222194	+	HTZ78_10400	P
TEP-288	CP054306	2229057	+	HTZ78_10430	I
TEP-289	CP054306	2230466	+	HTZ78_10435	P
TEP-290	CP054306	2236492	+	HTZ78_10470	I
TEP-291	CP054306	2236577	+	HTZ78_10470	P
TEP-292	CP054306	2242324	+	HTZ78_10490	P
TEP-293	CP054306	2249472	-	tRNA27-Leu	P
TEP-294	CP054306	2251094	+	HTZ78_10540	A
TEP-295	CP054306	2252062	+	-	N
TEP-296	CP054306	2261550	-	HTZ78_10600	P
TEP-297	CP054306	2264936	+	HTZ78_10610	P
TEP-298	CP054306	2276237	-	HTZ78_10655	P
TEP-299	CP054306	2287916	-	tRNA28-Glu	P
TEP-300	CP054306	2289152	+	HTZ78_10735	P
TEP-301	CP054306	2293326	+	HTZ78_10760	P
TEP-302	CP054306	2320996	-	HTZ78_10870	U
TEP-303	CP054306	2321066	-	HTZ78_10870	U
TEP-304	CP054306	2325946	-	HTZ78_10890	P
TEP-305	CP054306	2327276	+	HTZ78_10900	U
TEP-306	CP054306	2354058	+	HTZ78_10930	U
TEP-307	CP054306	2355919	+	HTZ78_10930	P
TEP-308	CP054306	2373737	-	HTZ78_11040	P
TEP-309	CP054306	2375366	+	tRNA29-Leu	P
TEP-310	CP054306	2390045	+	HTZ78_11115	P
TEP-311	CP054306	2398706	-	-	N
TEP-312	CP054306	2398892	+	HTZ78_11150	P
TEP-313	CP054306	2412584	+	HTZ78_11225	P
TEP-314	CP054306	2416757	-	HTZ78_11245	A
TEP-315	CP054306	2433199	-	tRNA30-Pro	P
TEP-316	CP054306	2442539	-	HTZ78_11390	P
TEP-317	CP054306	2445171	-	HTZ78_11395	P
TEP-318	CP054306	2457601	+	HTZ78_11440	P
TEP-319	CP054306	2462634	+	HTZ78_11470	P
TEP-320	CP054306	2480367	-	HTZ78_11550	P
TEP-321	CP054306	2502828	-	HTZ78_11645	P
TEP-322	CP054306	2514296	+	HTZ78_11695	P
TEP-323	CP054306	2517523	+	HTZ78_11720	U
TEP-324	CP054306	2526543	+	HTZ78_11805	P
TEP-325	CP054306	2527917	+	HTZ78_11810	P
TEP-326	CP054306	2551236	+	HTZ78_11955	P
TEP-327	CP054306	2552802	+	HTZ78_11965	S
TEP-328	CP054306	2552872	+	HTZ78_11965	P
TEP-329	CP054306	2564884	+	HTZ78_12020	P
TEP-330	CP054306	2568689	-	tRNA31-Gly	P
TEP-331	CP054306	2577371	+	HTZ78_12080	P
TEP-332	CP054306	2579312	-	HTZ78_12085	A
TEP-333	CP054306	2583832	-	HTZ78_12110	P
TEP-334	CP054306	2585240	-	HTZ78_12120	P
TEP-335	CP054306	2589685	-	HTZ78_12145	P
TEP-336	CP054306	2604714	-	HTZ78_12205	P
TEP-337	CP054306	2638934	-	HTZ78_12350	P
TEP-338	CP054306	2646505	-	HTZ78_12380	P
TEP-339	CP054306	2667711	-	HTZ78_12480	A
TEP-340	CP054306	2672980	+	HTZ78_12490	P
TEP-341	CP054306	2681822	+	HTZ78_12510	P
TEP-342	CP054306	2718786	-	HTZ78_12670	A
TEP-343	CP054306	2719964	-	HTZ78_12680	A
TEP-344	CP054306	2720159	+	HTZ78_12680	I
TEP-345	CP054306	2723386	+	HTZ78_12685	P
TEP-346	CP054306	2723813	+	HTZ78_12690	P
TEP-347	CP054306	2743637	-	HTZ78_12780	P
TEP-348	CP054306	2744455	+	HTZ78_12785	A
TEP-349	CP054306	2747619	-	tRNA32-Trp	P
TEP-350	CP054306	2762634	-	-	N
TEP-351	CP054306	2767433	+	HTZ78_12895	P
TEP-352	CP054306	2773458	+	HTZ78_12940	U
TEP-353	CP054306	2775439	+	HTZ78_12940	P
TEP-354	CP054306	2783507	-	HTZ78_12980	P
TEP-355	CP054306	2784118	+	-	N
TEP-356	CP054306	2795917	+	HTZ78_13040	P
TEP-357	CP054306	2810641	-	HTZ78_13100	P
TEP-358	CP054306	2818131	-	HTZ78_13140	P
TEP-359	CP054306	2821437	+	HTZ78_13150	P
TEP-360	CP054306	2822745	+	HTZ78_13160	U
TEP-361	CP054306	2830151	+	HTZ78_13160	P
TEP-362	CP054306	2831373	-	HTZ78_13170	P
TEP-363	CP054306	2840062	-	HTZ78_13205	P
TEP-364	CP054306	2856994	+	HTZ78_13275	P
TEP-365	CP054306	2864162	+	HTZ78_13310	P
TEP-366	CP054306	2871287	+	HTZ78_13350	P
TEP-367	CP054306	2884414	-	tRNA33-Met	P
TEP-368	CP054306	2884485	+	HTZ78_13395	P
TEP-369	CP054306	2897428	-	HTZ78_13455	P
TEP-370	CP054306	2897968	-	tRNA34-Leu	P
TEP-371	CP054306	2900401	+	HTZ78_13470	P
TEP-372	CP054306	2927184	+	HTZ78_13580	U
TEP-373	CP054306	2927528	-	-	N
TEP-374	CP054306	2934291	-	tRNA35-Pro	P
TEP-375	CP054306	2935948	-	HTZ78_13625	P
TEP-376	CP054306	2937897	+	HTZ78_13630	P
TEP-377	CP054306	2953414	-	HTZ78_13695	P
TEP-378	CP054306	2957912	-	-	N
TEP-379	CP054306	2958281	+	HTZ78_13725	P
TEP-380	CP054306	2959743	+	HTZ78_13735	P
TEP-381	CP054306	2965824	-	HTZ78_13770	P
TEP-382	CP054306	3004596	+	HTZ78_13960	P
TEP-383	CP054306	3011896	+	HTZ78_13985	P
TEP-384	CP054306	3016315	-	HTZ78_14015	P
TEP-385	CP054306	3021879	-	HTZ78_14050	P
TEP-386	CP054306	3026732	+	HTZ78_14080	S
TEP-387	CP054306	3027281	+	HTZ78_14080	P
TEP-388	CP054306	3031966	-	HTZ78_14115	P
TEP-389	CP054306	3044978	+	HTZ78_14170	A
TEP-390	CP054306	3054347	+	HTZ78_14225	P
TEP-391	CP054306	3065414	+	HTZ78_14275	U
TEP-392	CP054306	3084752	+	HTZ78_14380	P
TEP-393	CP054306	3107508	-	HTZ78_14495	S
TEP-394	CP054306	3107605	-	HTZ78_14495	P
TEP-395	CP054306	3109240	+	HTZ78_14500	U
TEP-396	CP054306	3109628	+	HTZ78_14500	P
TEP-397	CP054306	3109656	+	HTZ78_14500	S
TEP-398	CP054306	3133130	+	HTZ78_14650	I
TEP-399	CP054306	3137715	+	HTZ78_14670	P
TEP-400	CP054306	3146151	+	HTZ78_14695	I
TEP-401	CP054306	3169963	+	HTZ78_14815	P
TEP-402	CP054306	3185774	-	HTZ78_14860	P
TEP-403	CP054306	3186547	+	HTZ78_14865	P
TEP-404	CP054306	3198542	-	HTZ78_14925	P
TEP-405	CP054306	3221960	+	HTZ78_15040	A
TEP-406	CP054306	3224730	+	HTZ78_15060	P
TEP-407	CP054306	3233280	-	HTZ78_15100	P
TEP-408	CP054306	3245349	-	HTZ78_15140	P
TEP-409	CP054306	3245540	+	HTZ78_15135	P
TEP-410	CP054306	3247191	-	HTZ78_15150	P
TEP-411	CP054306	3249397	+	HTZ78_15150	A
TEP-412	CP054306	3250756	+	HTZ78_15155	P
TEP-413	CP054306	3259691	+	HTZ78_15190	P
TEP-414	CP054306	3301479	+	HTZ78_15365	P
TEP-415	CP054306	3314228	-	HTZ78_15435	P
TEP-416	CP054306	3318869	+	HTZ78_15450	P
TEP-417	CP054306	3319000	+	HTZ78_15450	S
TEP-418	CP054306	3320331	-	HTZ78_15465	P
TEP-419	CP054306	3322067	-	HTZ78_15470	P
TEP-420	CP054306	3330970	-	HTZ78_15500	I
TEP-421	CP054306	3331085	-	HTZ78_15500	I
TEP-422	CP054306	3338546	+	HTZ78_15535	I
TEP-423	CP054306	3341363	-	HTZ78_15550	P
TEP-424	CP054306	3343111	-	HTZ78_15555	P
TEP-425	CP054306	3355254	-	-	N
TEP-426	CP054306	3357600	-	HTZ78_15610	P
TEP-427	CP054306	3362810	+	HTZ78_15645	P
TEP-428	CP054306	3366703	+	HTZ78_15680	P
TEP-429	CP054306	3368234	-	HTZ78_15695	P
TEP-430	CP054306	3371080	+	tRNA37-Ser	P
TEP-431	CP054306	3371347	+	HTZ78_15720	U
TEP-432	CP054306	3371918	+	HTZ78_15720	I
TEP-433	CP054306	3378168	-	tRNA38-Ser	P
TEP-434	CP054306	3385746	-	HTZ78_15805	P
TEP-435	CP054306	3388986	+	HTZ78_15820	P
TEP-436	CP054306	3400787	-	-	N
TEP-437	CP054306	3401346	+	HTZ78_15885	P
TEP-438	CP054306	3401706	+	HTZ78_15885	S
TEP-439	CP054306	3402852	-	-	N
TEP-440	CP054306	3402924	+	tRNA39-His	P
TEP-441	CP054306	3418723	-	HTZ78_15955	P
TEP-442	CP054306	3421638	+	HTZ78_15960	P
TEP-443	CP054306	3434603	+	HTZ78_16020	P
TEP-444	CP054306	3439256	+	HTZ78_16040	A
TEP-445	CP054306	3439959	-	HTZ78_16045	P
TEP-446	CP054306	3445575	-	tRNA40-Thr	P
TEP-447	CP054306	3446215	-	HTZ78_16085	S
TEP-448	CP054306	3446257	-	HTZ78_16085	P
TEP-449	CP054306	3446800	+	-	N
TEP-450	CP054306	3448142	+	HTZ78_16090	P
TEP-451	CP054306	3450550	-	HTZ78_16115	P
TEP-452	CP054306	3451702	-	HTZ78_16115	U
TEP-453	CP054306	3452012	-	-	N
TEP-454	CP054306	3452606	+	HTZ78_16120	I
TEP-455	CP054306	3453018	-	HTZ78_16125	P
TEP-456	CP054306	3453050	-	HTZ78_16125	S
TEP-457	CP054306	3459833	-	HTZ78_16145	P
TEP-458	CP054306	3463855	-	HTZ78_16170	P
TEP-459	CP054306	3464778	-	HTZ78_16175	A
TEP-460	CP054306	3475245	-	HTZ78_16220	A
TEP-461	CP054306	3514198	-	HTZ78_16415	U
TEP-462	CP054306	3517672	-	HTZ78_16435	P
TEP-463	CP054306	3528944	-	HTZ78_16485	P
TEP-464	CP054306	3540224	-	HTZ78_16525	P
TEP-465	CP054306	3566335	-	-	N
TEP-466	CP054306	3566949	+	HTZ78_16640	P
TEP-467	CP054306	3577338	+	HTZ78_16670	P
TEP-468	CP054306	3583074	-	HTZ78_16700	P
TEP-469	CP054306	3619730	-	-	N
TEP-470	CP054306	3628468	+	HTZ78_16935	I
TEP-471	CP054306	3637531	+	HTZ78_16975	I
TEP-472	CP054306	3645406	+	tRNA41-Tyr	P
TEP-473	CP054306	3645486	+	tRNA42-Thr	P
TEP-474	CP054306	3652203	+	HTZ78_17055	P
TEP-475	CP054306	3664416	+	HTZ78_17125	A
TEP-476	CP054306	3669351	-	HTZ78_17150	P
TEP-477	CP054306	3676956	+	HTZ78_17170	P
TEP-478	CP054306	3693456	-	HTZ78_17240	U
TEP-479	CP054307	23749	+	HTZ78_17415	P
TEP-480	CP054307	40199	-	HTZ78_17520	P
TEP-481	CP054307	69731	-	-	N
TEP-482	CP054308	8813	+	HTZ78_17755	P
TEP-483	CP054308	39589	+	HTZ78_17915	U
TEP-484	CP054308	41523	-	HTZ78_17930	P
TEP-485	CP054309	657	+	HTZ78_17940	P
TEP-486	CP054309	1239	+	HTZ78_17945	P
TEP-487	CP054309	1522	-	-	N
